# Supplementary material for: Affinity gaps among B cells in germinal centers drive the selection of MPER precursors
Source: PubMed Central journal article supplement (PMC11147770; doi:10.1038/s41590-024-01844-7), 2024-05-30
Supplement: 41590_2024_1844_MOESM1_ESM.pdf [file 41590_2024_1844_MOESM1_ESM.pdf]

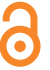

---

# Affinity gaps among B cells in germinal centers drive the selection of MPER precursors

---

In the format provided by the authors and unedited

---

## Table of Contents

*Contained within the primary supplemental pdf:*

### Supplemental Tables

**Supplementary Table 1.** List of index array and index primers.

**Supplementary Table 2.** X-ray data collection and refinement statistics.

*Uploaded as a separate excel file:*

**Supplementary Table 3.** Reagents and tools, related to Methods.

**Table S1: List of Index primer array and index primers used for single cell NGS Sequencing**

Index Primer Array

|   |     | 701     | 702     | 703     | 704     | 705     | 706     | 707     | 708     | 709     | 710     | 711     | 712     |
|---|-----|---------|---------|---------|---------|---------|---------|---------|---------|---------|---------|---------|---------|
| A | 501 | 701-501 | 702-501 | 703-501 | 704-501 | 705-501 | 706-501 | 707-501 | 708-501 | 709-501 | 710-501 | 711-501 | 712-501 |
| B | 502 | 701-502 | 702-502 | 703-502 | 704-502 | 705-502 | 706-502 | 707-502 | 708-502 | 709-502 | 710-502 | 711-502 | 712-502 |
| C | 503 | 701-503 | 702-503 | 703-503 | 704-503 | 705-503 | 706-503 | 707-503 | 708-503 | 709-503 | 710-503 | 711-503 | 712-503 |
| D | 504 | 701-504 | 702-504 | 703-504 | 704-504 | 705-504 | 706-504 | 707-504 | 708-504 | 709-504 | 710-504 | 711-504 | 712-504 |
| E | 505 | 701-505 | 702-505 | 703-505 | 704-505 | 705-505 | 706-505 | 707-505 | 708-505 | 709-505 | 710-505 | 711-505 | 712-505 |
| F | 506 | 701-506 | 702-506 | 703-506 | 704-506 | 705-506 | 706-506 | 707-506 | 708-506 | 709-506 | 710-506 | 711-506 | 712-506 |
| G | 507 | 701-507 | 702-507 | 703-507 | 704-507 | 705-507 | 706-507 | 707-507 | 708-507 | 709-507 | 710-507 | 711-507 | 712-507 |
| H | 508 | 701-508 | 702-508 | 703-508 | 704-508 | 705-508 | 706-508 | 707-508 | 708-508 | 709-508 | 710-508 | 711-508 | 712-508 |

Index Primer List—List of index primers used for single cell NGS sequencing.

|     |                    |                                                                       |
|-----|--------------------|-----------------------------------------------------------------------|
| 701 | Illumina ID - D701 | CAAGCAGAAGACGGCATAACGAGATCGAGTAATGTGACTGGAGTTCAGACGTGTGCTCTTCCGATCT   |
| 702 | Illumina ID - D702 | CAAGCAGAAGACGGCATAACGAGATCTCCGGAGTGACTGGAGTTCAGACGTGTGCTCTTCCGATCT    |
| 703 | Illumina ID - D703 | CAAGCAGAAGACGGCATAACGAGATAATGAGCGGTGACTGGAGTTCAGACGTGTGCTCTTCCGATCT   |
| 701 | Illumina ID - D704 | CAAGCAGAAGACGGCATAACGAGATGGAATCTCTGTGACTGGAGTTCAGACGTGTGCTCTTCCGATCT  |
| 702 | Illumina ID - D705 | CAAGCAGAAGACGGCATAACGAGATTTCTGAATGTGACTGGAGTTCAGACGTGTGCTCTTCCGATCT   |
| 703 | Illumina ID - D706 | CAAGCAGAAGACGGCATAACGAGATACGAATCTGTGACTGGAGTTCAGACGTGTGCTCTTCCGATCT   |
| 701 | Illumina ID - D707 | CAAGCAGAAGACGGCATAACGAGATAGCTTCAGGTGACTGGAGTTCAGACGTGTGCTCTTCCGATCT   |
| 702 | Illumina ID - D708 | CAAGCAGAAGACGGCATAACGAGATGCGCATTAGTGACTGGAGTTCAGACGTGTGCTCTTCCGATCT   |
| 703 | Illumina ID - D709 | CAAGCAGAAGACGGCATAACGAGATCATAGCCGGTGACTGGAGTTCAGACGTGTGCTCTTCCGATCT   |
| 701 | Illumina ID - D710 | CAAGCAGAAGACGGCATAACGAGATTTCCGGAGTGACTGGAGTTCAGACGTGTGCTCTTCCGATCT    |
| 702 | Illumina ID - D711 | CAAGCAGAAGACGGCATAACGAGATGCCGAGAGTGACTGGAGTTCAGACGTGTGCTCTTCCGATCT    |
| 703 | Illumina ID - D712 | CAAGCAGAAGACGGCATAACGAGATCTATCGGTGTGACTGGAGTTCAGACGTGTGCTCTTCCGATCT   |
| 501 | Illumina ID - D501 | AATGATACGGCGACCACCGAGATCTACACTATAGCCTACACTCTTCCCTACACGACGCTCTTCCGATCT |
| 502 | Illumina ID - D502 | AATGATACGGCGACCACCGAGATCTACACTATAGGCACACTCTTCCCTACACGACGCTCTTCCGATCT  |
| 503 | Illumina ID - D503 | AATGATACGGCGACCACCGAGATCTACACTATCCTACACTCTTCCCTACACGACGCTCTTCCGATCT   |
| 504 | Illumina ID - D504 | AATGATACGGCGACCACCGAGATCTACACGGCTCTGAACACTCTTCCCTACACGACGCTCTTCCGATCT |
| 505 | Illumina ID - D505 | AATGATACGGCGACCACCGAGATCTACACAGGCAGACACTCTTCCCTACACGACGCTCTTCCGATCT   |
| 506 | Illumina ID - D506 | AATGATACGGCGACCACCGAGATCTACACTAATCTTACACTCTTCCCTACACGACGCTCTTCCGATCT  |
| 507 | Illumina ID - D507 | AATGATACGGCGACCACCGAGATCTACACCAGGAGTACACTCTTCCCTACACGACGCTCTTCCGATCT  |
| 508 | Illumina ID - D508 | AATGATACGGCGACCACCGAGATCTACACGTACTGACACTCTTCCCTACACGACGCTCTTCCGATCT   |

**Table S2. X-ray data collection and refinement statistics**

| Data collection                                                      | Ab 45.1 +<br>GT10.2  | Ab 45.2 +<br>GT10.2 glycan KO |
|----------------------------------------------------------------------|----------------------|-------------------------------|
| Beamline                                                             | ALS-5.0.1            | APS 23-ID-B                   |
| Wavelength (Å)                                                       | 0.97741              | 1.0337                        |
| Space group                                                          | P 3 <sub>1</sub> 2 1 | P 1                           |
| Unit cell parameters                                                 |                      |                               |
| a, b, c (Å)                                                          | 197.0, 197.0, 93.2   | 37.6, 46.6, 178.4             |
| α, β, γ (°)                                                          | 90, 90, 120          | 86.7, 86.8, 77.0              |
| Resolution (Å) <sup>a</sup>                                          | 50-3.00 (3.05-3.00)  | 50-2.07 (2.11-2.07)           |
| Unique reflections <sup>a</sup>                                      | 41,850 (3,894)       | 63,266 (6,109)                |
| Redundancy <sup>a</sup>                                              | 7.5 (7.5)            | 3.0 (1.9)                     |
| Completeness (%) <sup>a</sup>                                        | 100 (100)            | 88.6 (88.0)                   |
| <I/σ <sub>I</sub> > <sup>a</sup>                                     | 5.9 (0.3)            | 8.9 (2.0)                     |
| R <sub>sym</sub> <sup>b</sup> (%) <sup>a</sup>                       | 30.5 (>100)          | 14.5 (48.6)                   |
| R <sub>pim</sub> <sup>b</sup> (%) <sup>a</sup>                       | 12.7 (>100)          | 9.7 (40.5)                    |
| CC <sub>1/2</sub> <sup>c</sup> (%) <sup>a</sup>                      | 97.3 (30.8)          | 98.3 (83.6)                   |
| <b>Refinement statistics</b>                                         |                      |                               |
| Resolution (Å)                                                       | 49.2-3.00            | 44.5-2.07                     |
| Reflections (work)                                                   | 40,528               | 62,857                        |
| Reflections (test)                                                   | 2,058                | 3,069                         |
| R <sub>cryst</sub> <sup>d</sup> / R <sub>free</sub> <sup>e</sup> (%) | 26.8/29.3            | 25.0/29.1                     |
| No. of copies in ASU                                                 | 1                    | 2                             |
| No. of atoms                                                         | 4,639                | 9,996                         |
| Fab                                                                  | 3,382                | 6,818                         |
| Scaffold                                                             | 1,257                | 2,486                         |
| Solvent                                                              | N/A                  | 692                           |
| Average B-values (Å <sup>2</sup> )                                   | 76                   | 31                            |
| Fab                                                                  | 71                   | 29                            |
| Scaffold                                                             | 90                   | 34                            |
| Solvent                                                              | N/A                  | 38                            |
| Wilson B-value (Å <sup>2</sup> )                                     | 55                   | 24                            |
| <b>RMSD from ideal geometry</b>                                      |                      |                               |
| Bond length (Å)                                                      | 0.002                | 0.003                         |
| Bond angle (°)                                                       | 0.60                 | 0.65                          |
| <b>Ramachandran statistics (%)<sup>f</sup></b>                       |                      |                               |
| Favored                                                              | 95.1                 | 98.0                          |
| Outliers                                                             | 0.00                 | 0.08                          |
| <b>PDB code</b>                                                      | 9BDH                 | 9BDI                          |

<sup>a</sup> Numbers in parentheses refer to the highest resolution shell.

<sup>b</sup>  $R_{sym} = \sum_{hkl} \sum_i |I_{hkl,i} - \langle I_{hkl} \rangle| / \sum_{hkl} \sum_i I_{hkl,i}$  and  $R_{pim} = \sum_{hkl} (1/(n-1))^{1/2} \sum_i |I_{hkl,i} - \langle I_{hkl} \rangle| / \sum_{hkl} \sum_i I_{hkl,i}$ , where  $I_{hkl,i}$  is the scaled intensity of the  $i^{\text{th}}$  measurement of reflection  $h, k, l$ ,  $\langle I_{hkl} \rangle$  is the average intensity for that reflection, and  $n$  is the redundancy.

<sup>c</sup> CC<sub>1/2</sub> = Pearson correlation coefficient between two random half datasets.

<sup>d</sup>  $R_{cryst} = \sum_{hkl} |F_o - F_c| / \sum_{hkl} |F_o| \times 100$ , where  $F_o$  and  $F_c$  are the observed and calculated structure factors, respectively.

<sup>e</sup>  $R_{free}$  was calculated as for  $R_{cryst}$ , but on a test set comprising 5% of the data excluded from refinement.

<sup>f</sup> From MolProbity (71).
